# Supplementary material
Source: Elsevier journal article supplement (https://www.sciencedirect.com/science/article/pii/S0104001420302074)

BJAN-2019-183 – Supplementary Material

**Appendix 1 Perioperative satisfaction questionnaire EVAN-G translated to Spanish.**


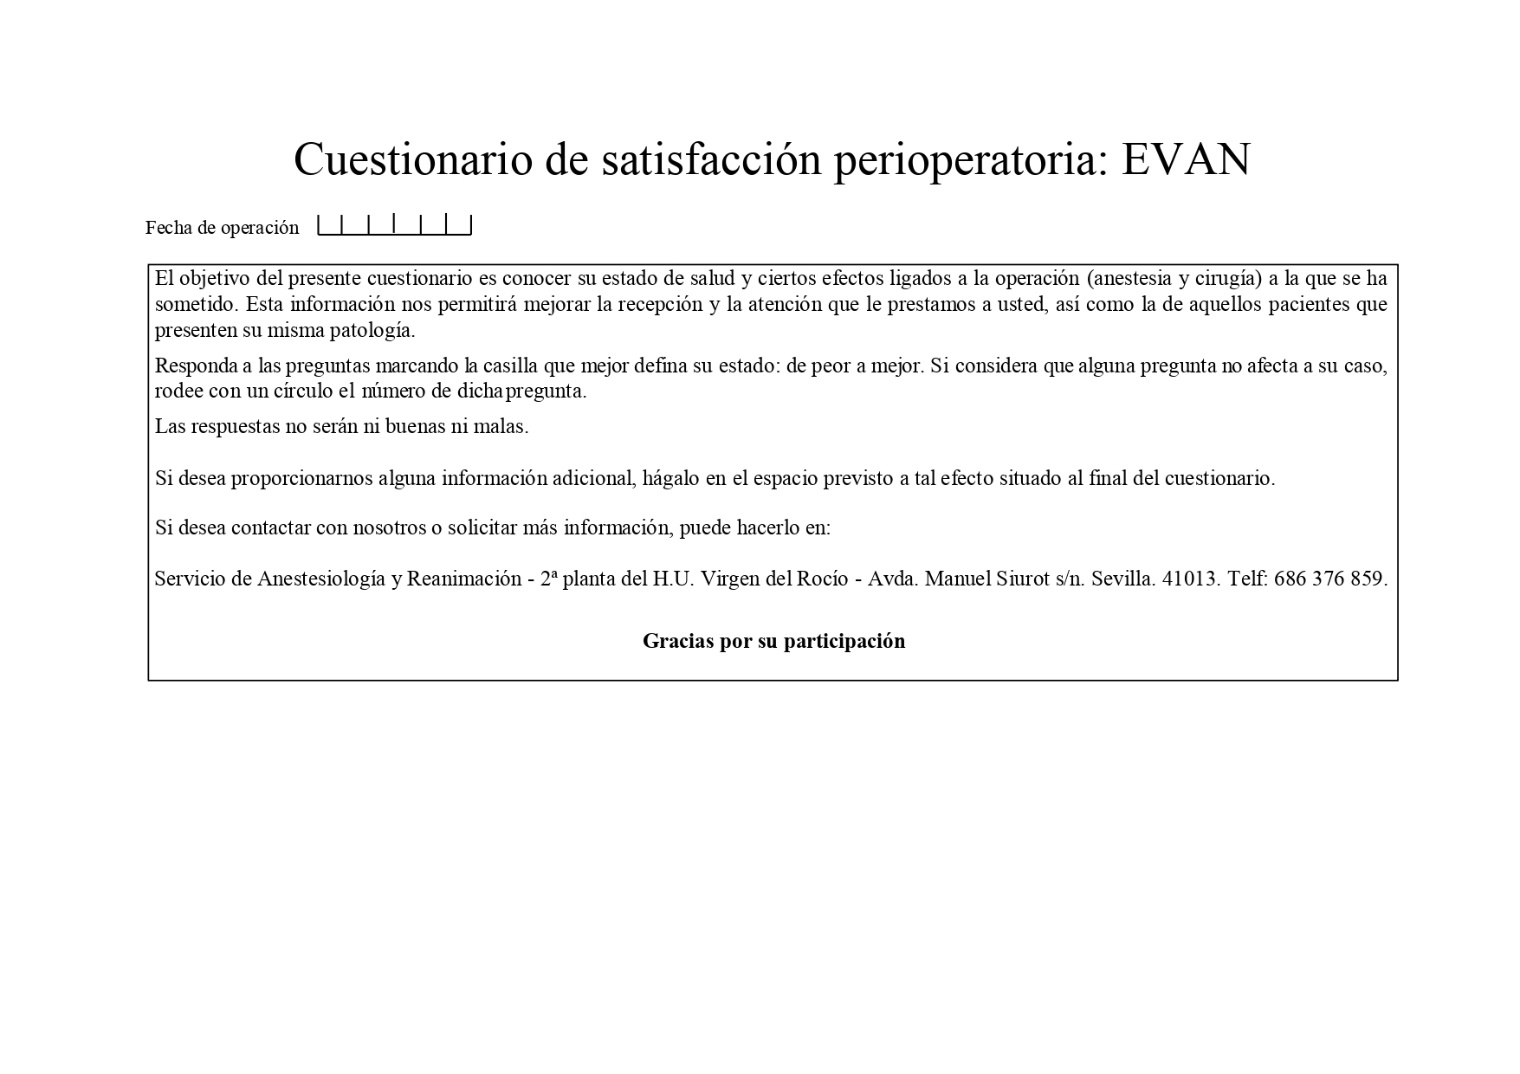


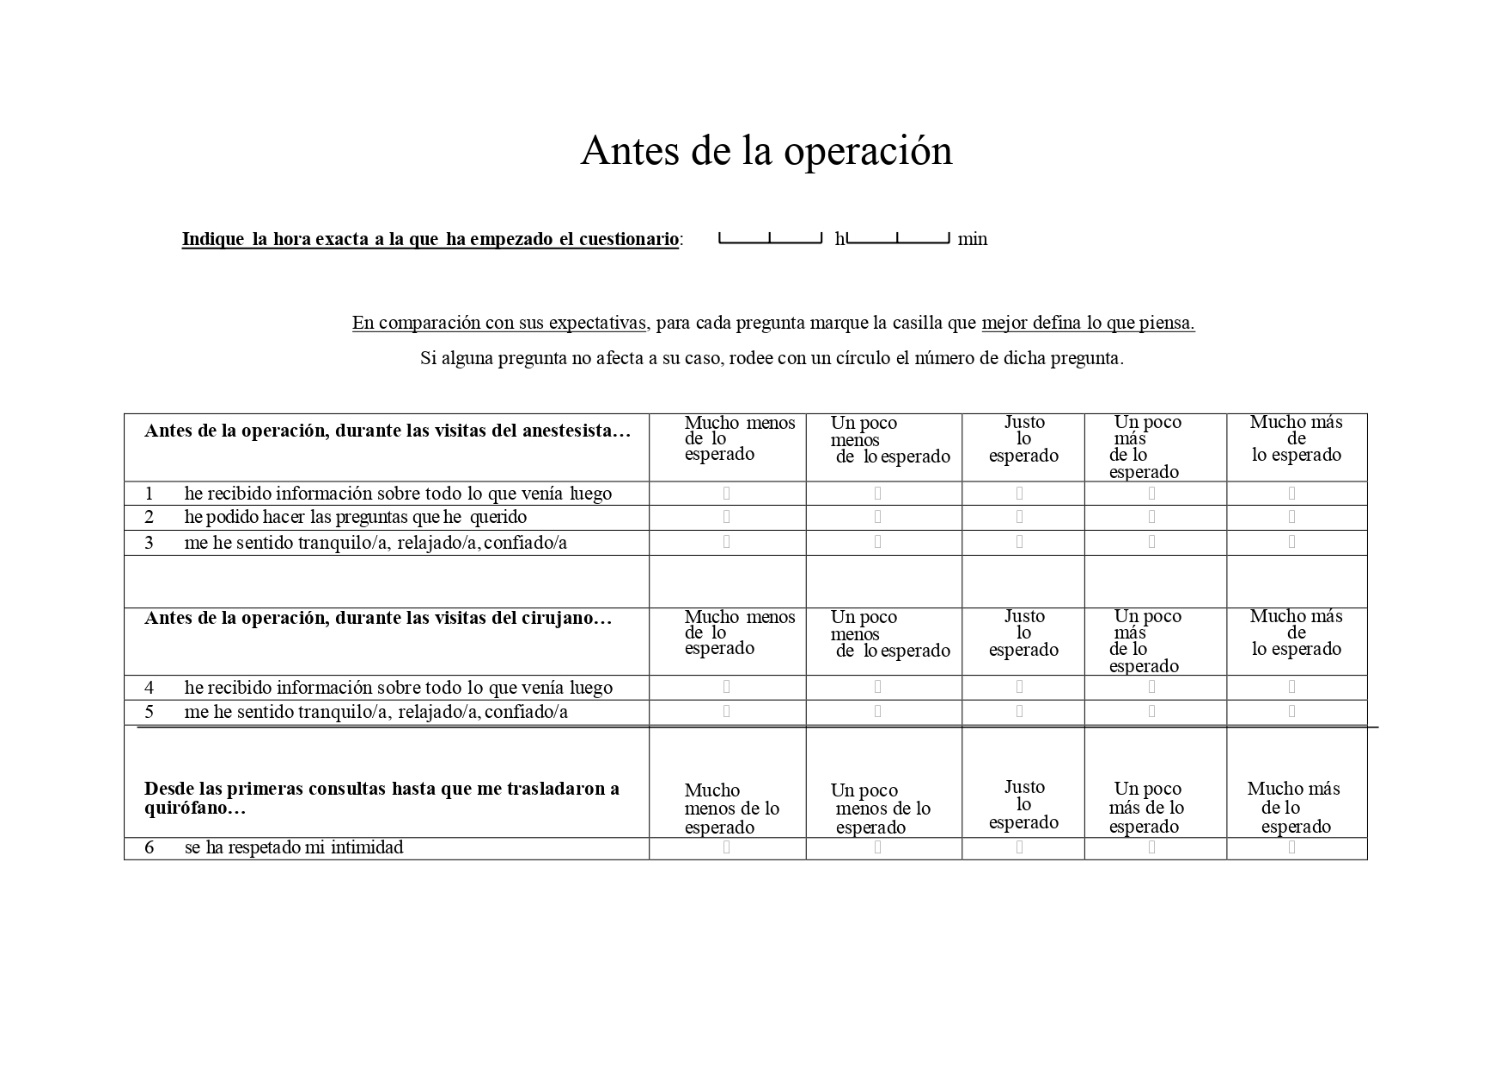


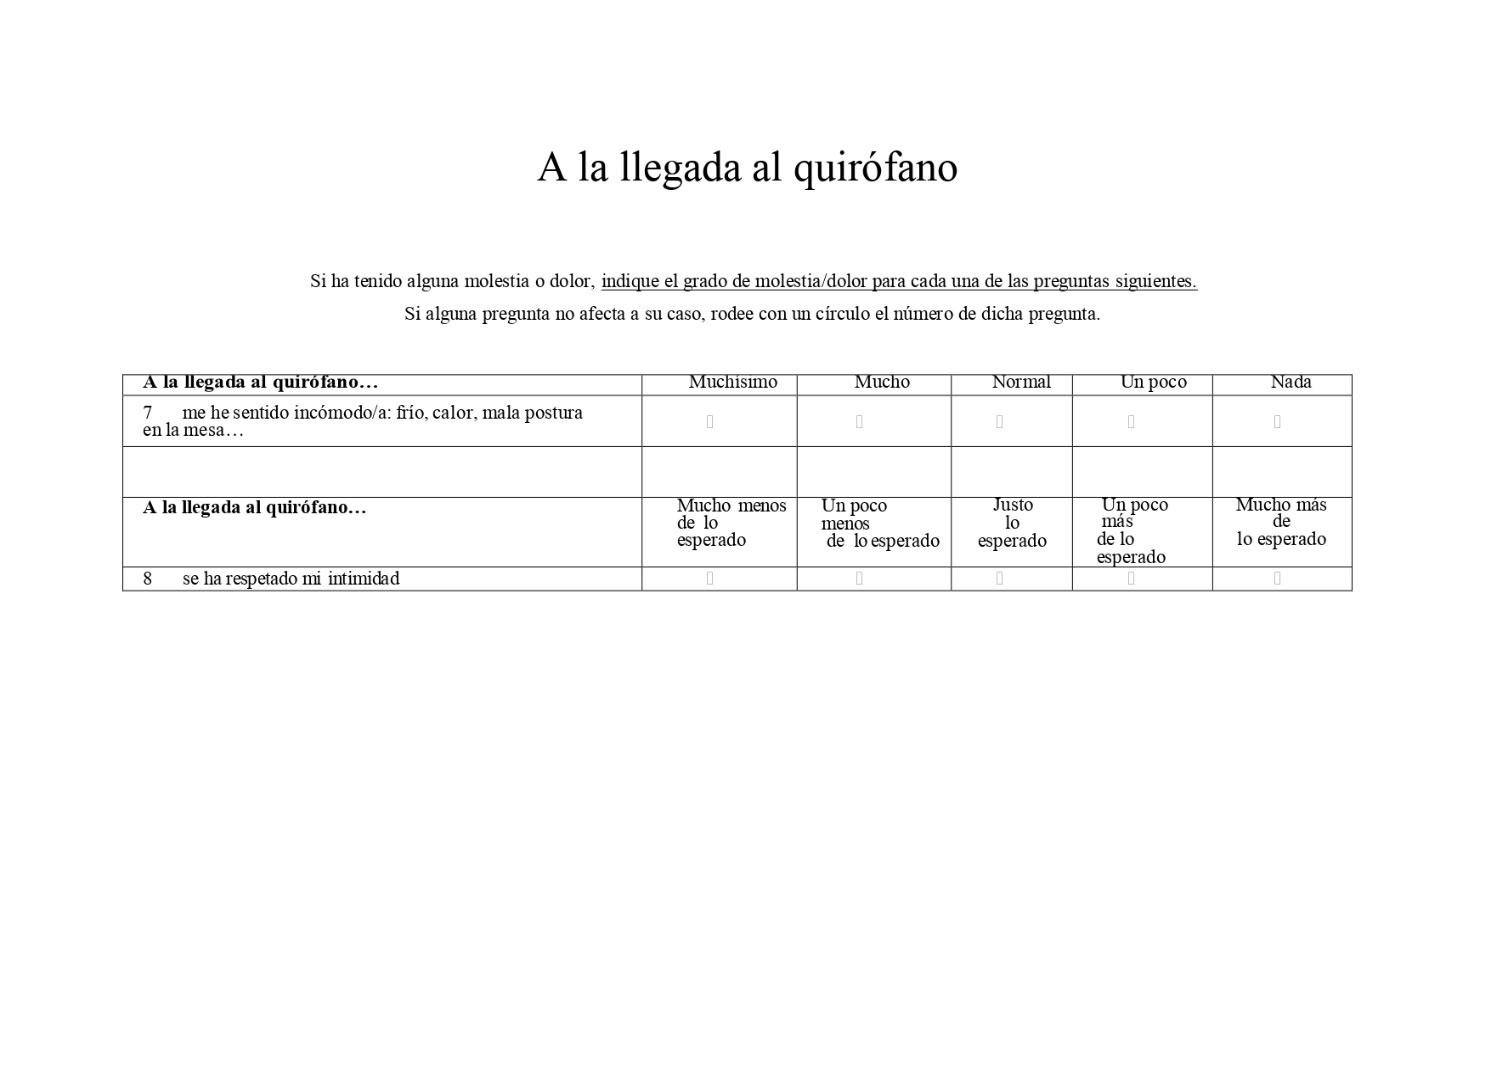


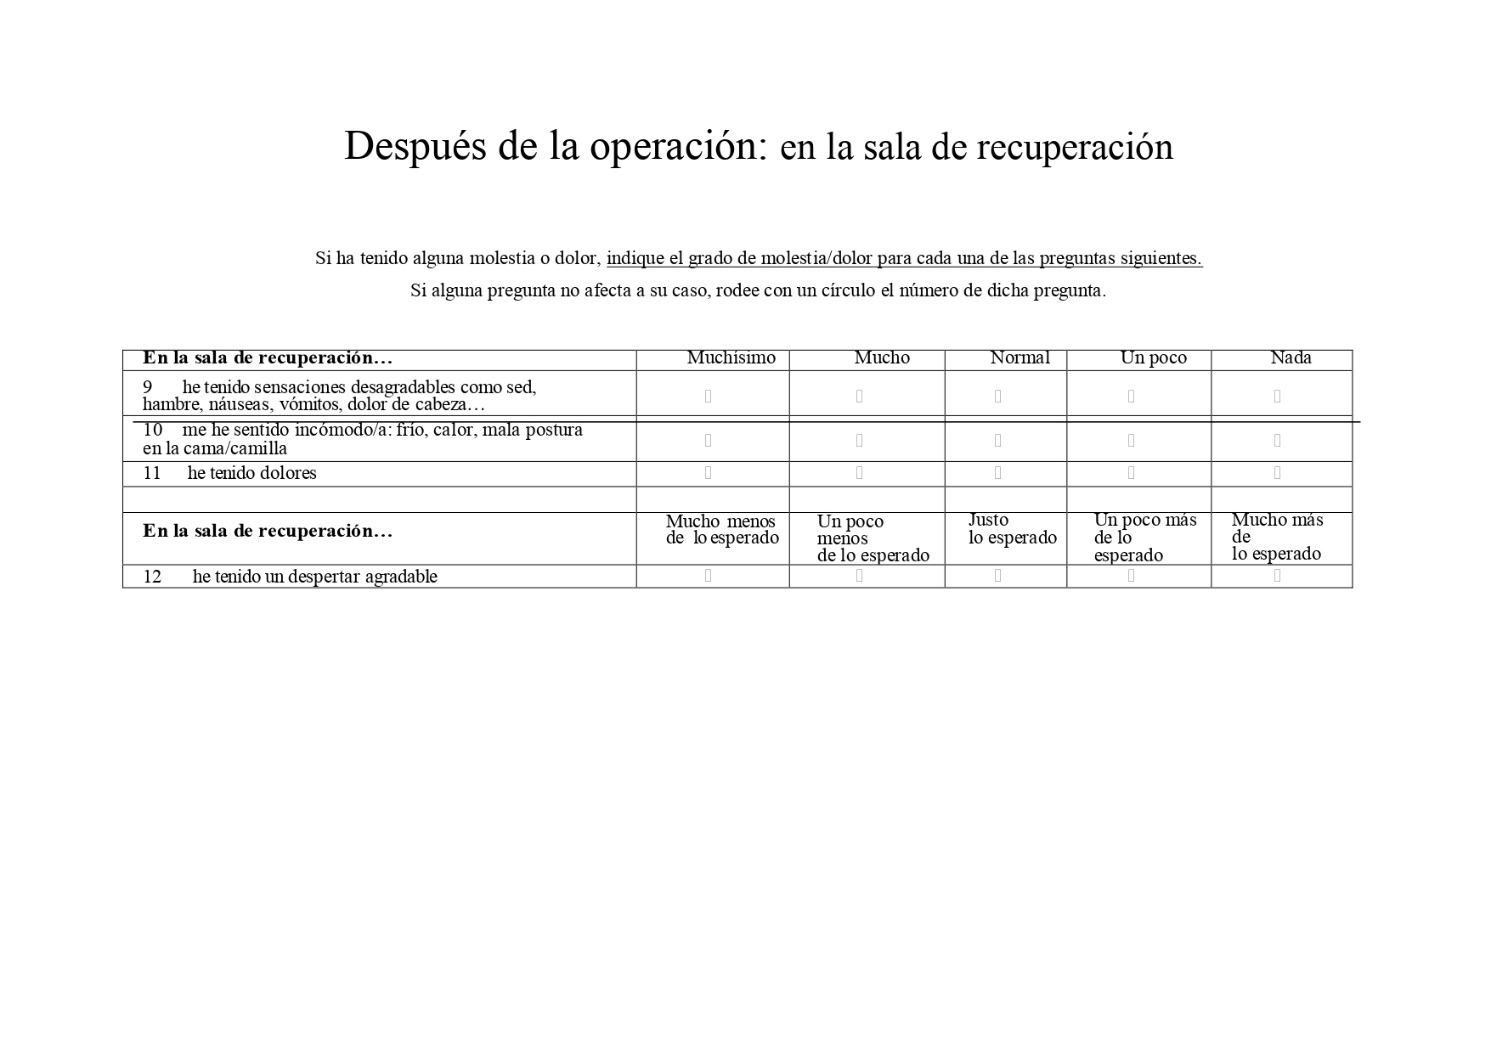


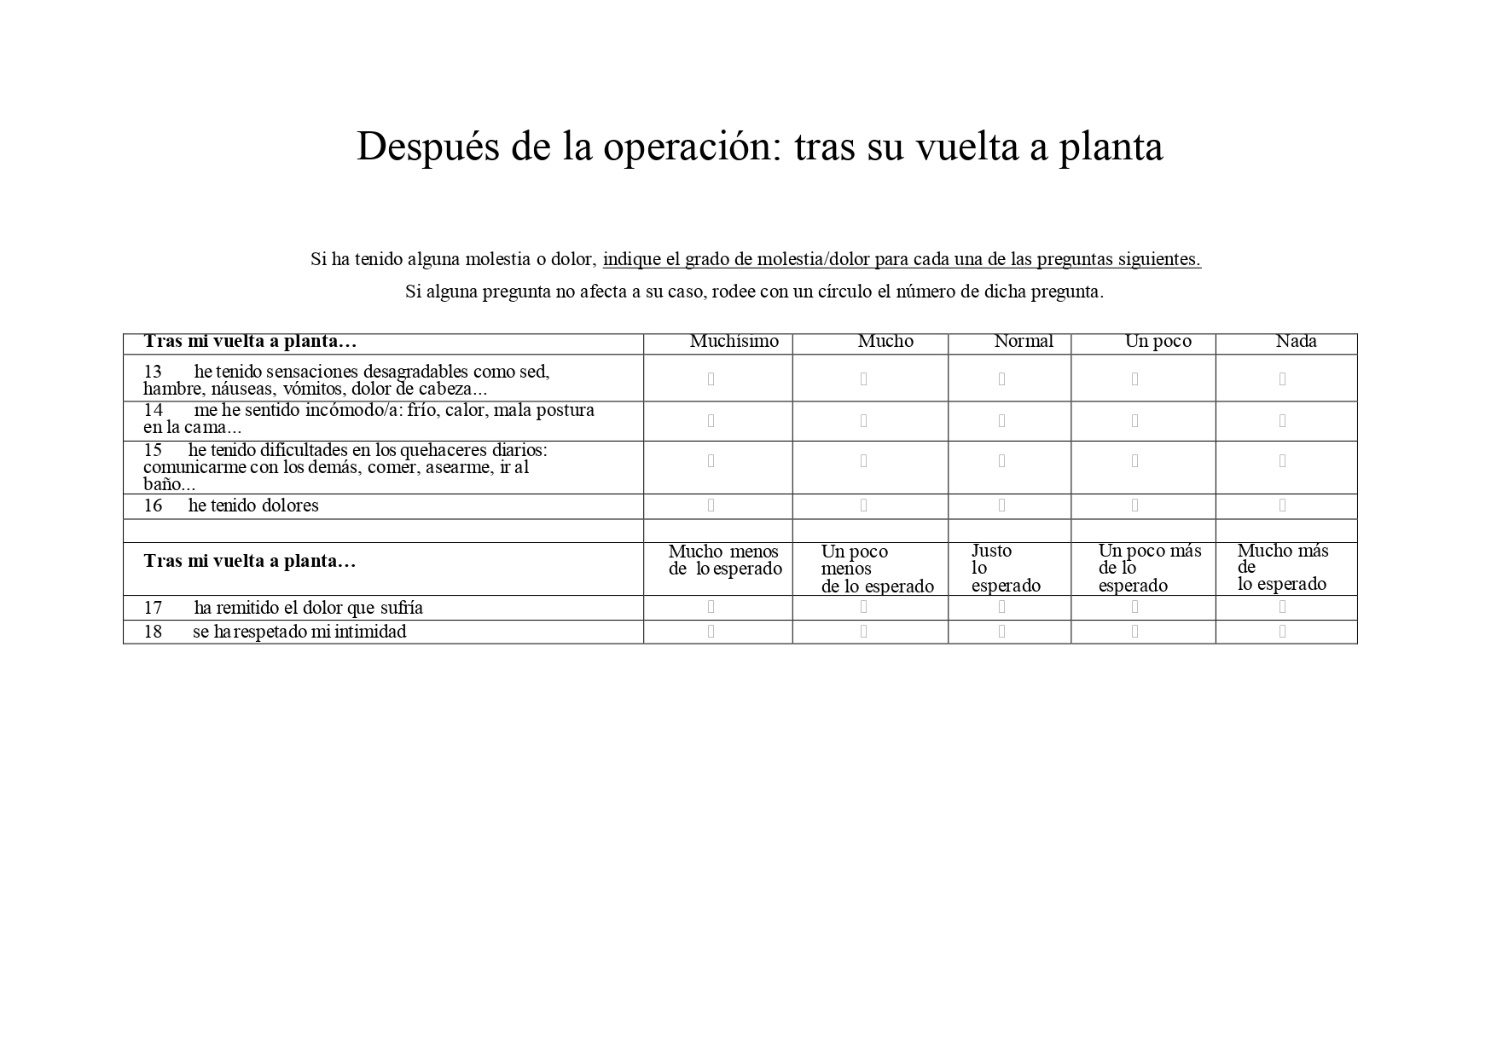


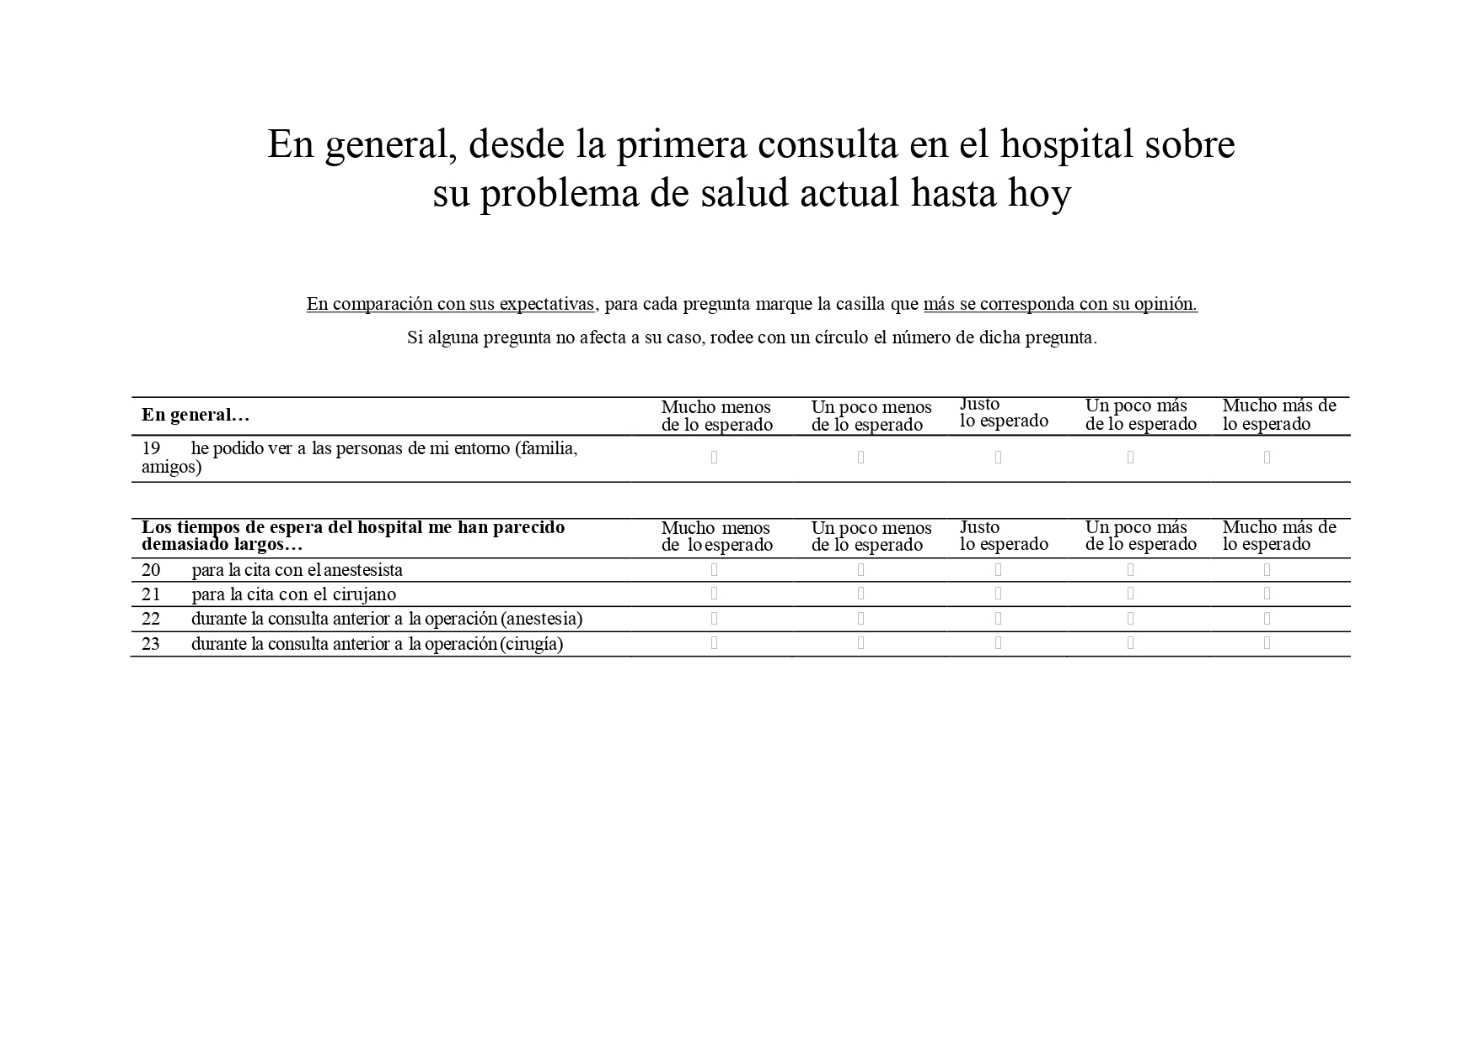

Supplement: mmc1 [file S0104001420302074:mmc1.docx]
